# Supplementary material
Source: PubMed Central journal article supplement (PMC9121176)

## Supplementary Figures

### Patterns of Cilia Gene Dysregulations in Major Psychiatric Disorders

Wedad Alhassen<sup>1</sup>, Siwei Chen<sup>2,3</sup>, Marquis Vawter<sup>4</sup>, Brianna Kay Robbins<sup>1</sup>, Henry Nguyen<sup>1</sup>, Thant Nyi Myint<sup>1</sup>, Yumiko Saito<sup>5</sup>, Anton Schulmann<sup>6</sup>, Surya M. Nauli<sup>7</sup>, Olivier Civelli<sup>1,8</sup>, Pierre Baldi<sup>2,3</sup>, Amal Alachkar<sup>1,2\*</sup>

1 Departments of Pharmaceutical Sciences, School of Pharmacy, University of California-Irvine, CA 92697

2 Department of Computer Science, School of Information and Computer Sciences, University of California-Irvine, Irvine, CA 92697, USA

3 Institute for Genomics and Bioinformatics, School of Information and Computer Sciences, University of California-Irvine, CA 92697

4 Department of Psychiatry and Human Behavior, School of Medicine, University of California, Irvine

5 Graduate School of Integrated Arts and Sciences, Hiroshima University, Japan

6 Human Genetics Branch, National Institute of Mental Health, BETHESDA MD 20814, USA

7 Pharmaceutical Sciences, School of Pharmacy, Chapman University, Health Science Campus, Chapman University, Irvine, California 92618, United States

8 Department of Developmental and Cell Biology, School of Biological Sciences, University of California-Irvine, CA 92697

#### \* Corresponding Author:

Amal Alachkar

Department of Pharmaceutical Sciences

University of California, Irvine

356A Med Surge II

Irvine CA, 92697-4625

Phone; 949-824-2522

[aalachka@uci.edu](mailto:aalachka@uci.edu)

## Supplementary Figures

**Figure S1. Sub-cilia localization of the genes that exhibited overlap between the four disorders.**

**a-f.** Sub-cilia localization of DEGs that exhibited overlap between **(a)** SCZ and ASD, **(b)** SCZ and BP, **(c)** SCZ and MDD, **(d)** ASD and BP, **(e)** ASD and MDD, and **(f)** BP and MDD. Upregulated and downregulated DEGs are in green and red respectively.

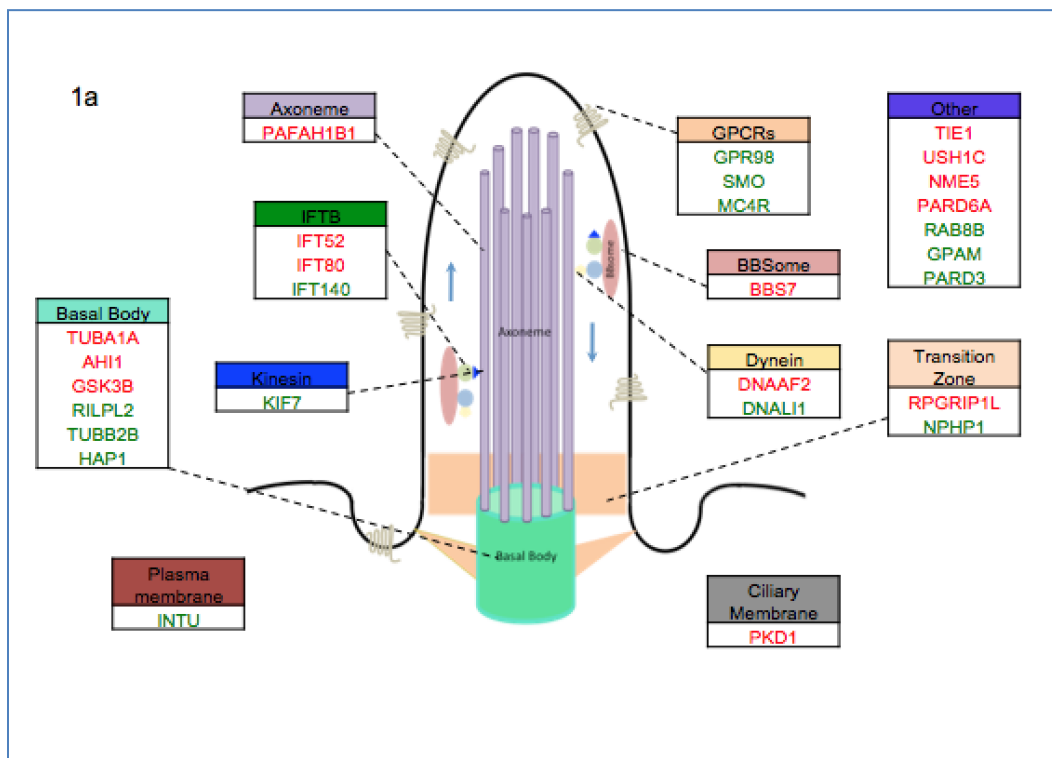

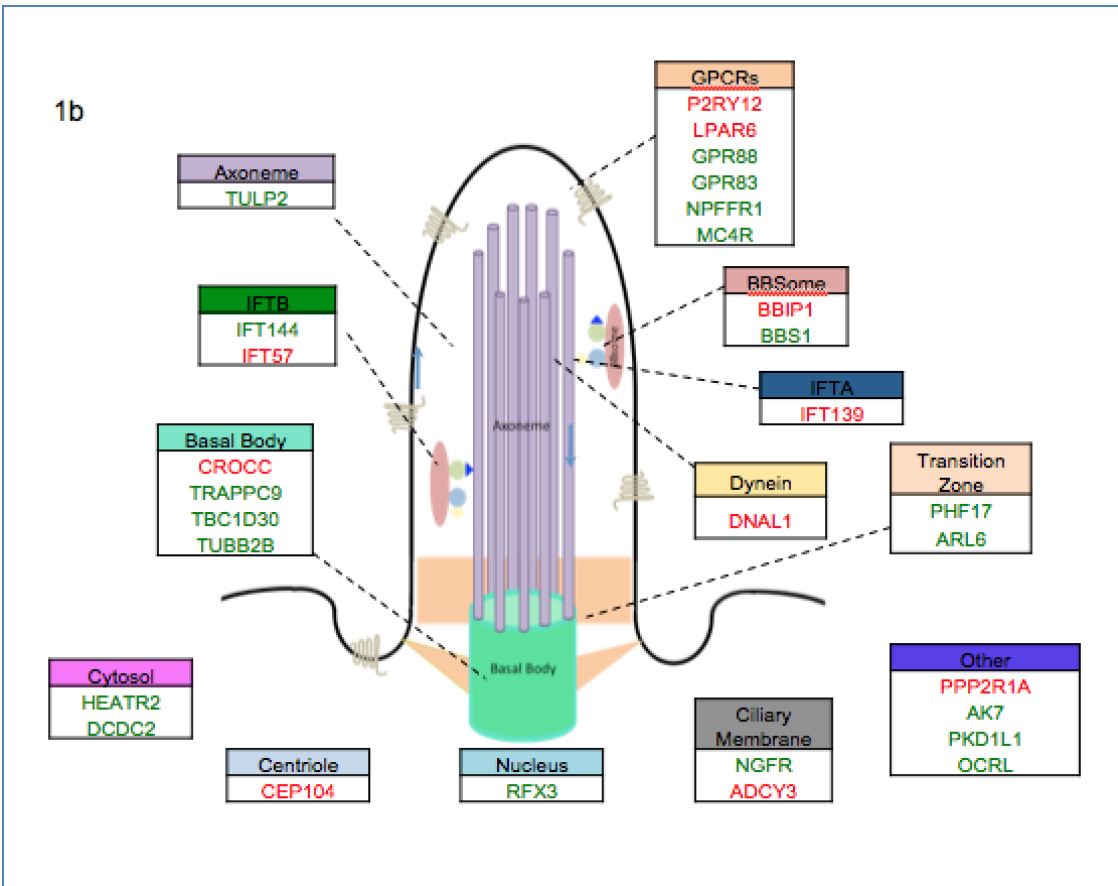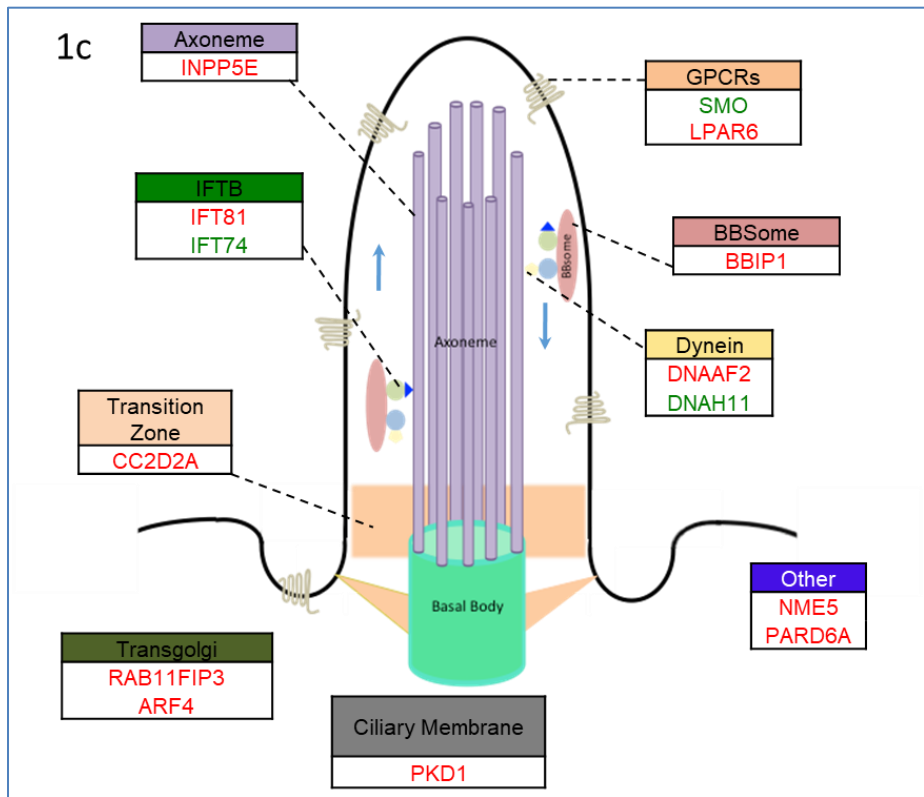

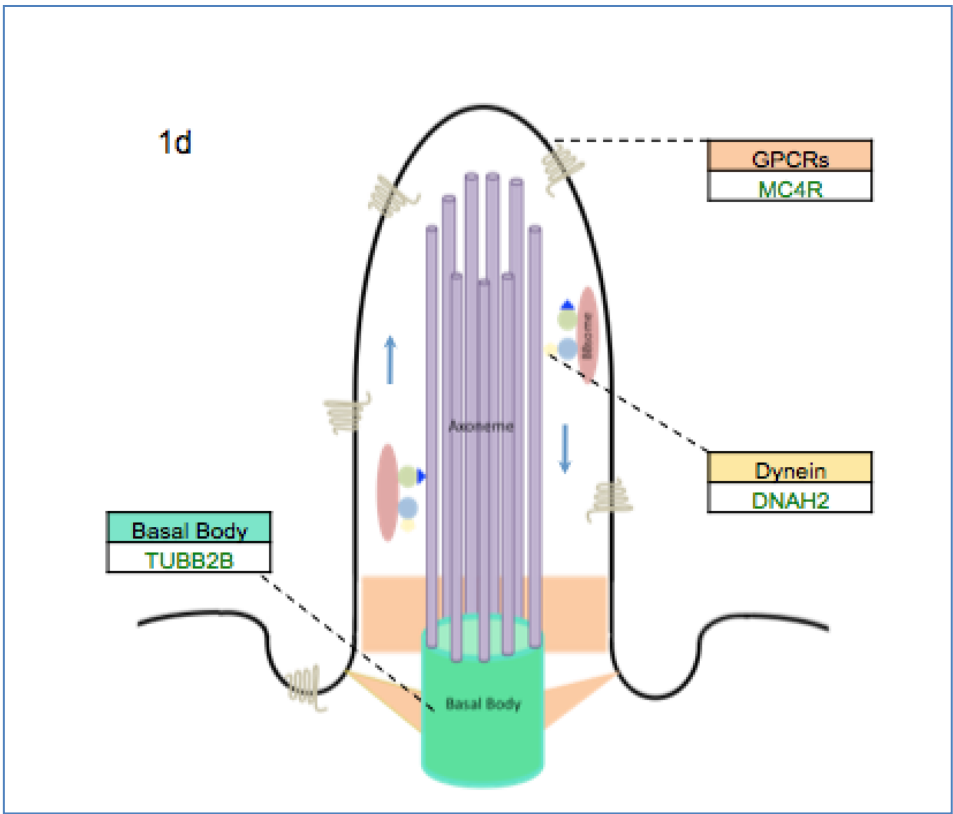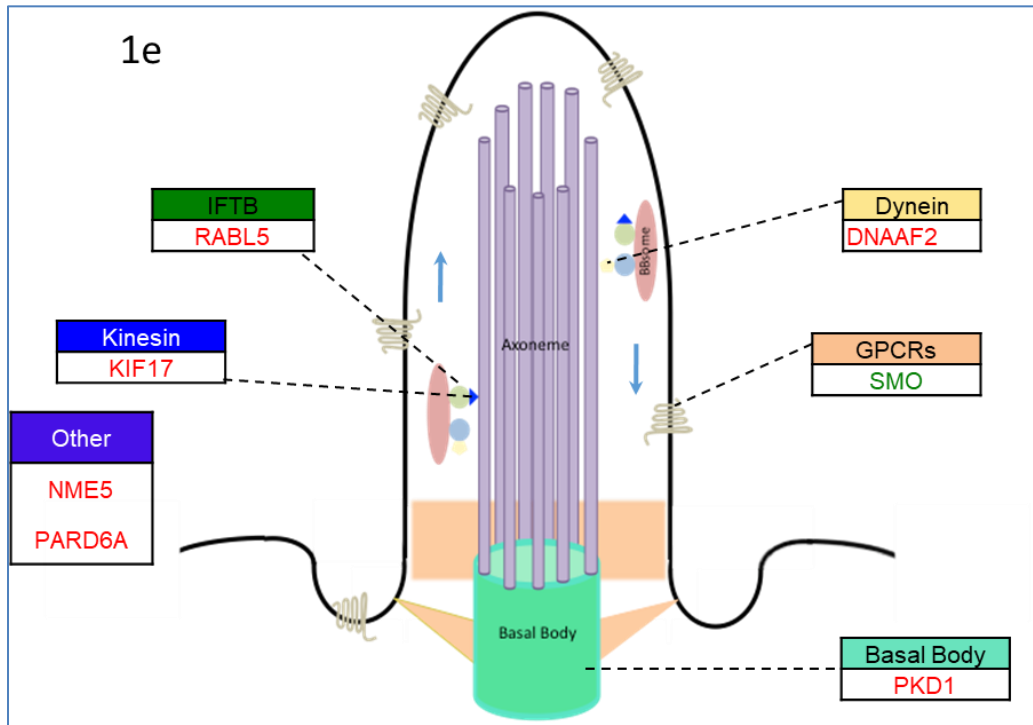

1f

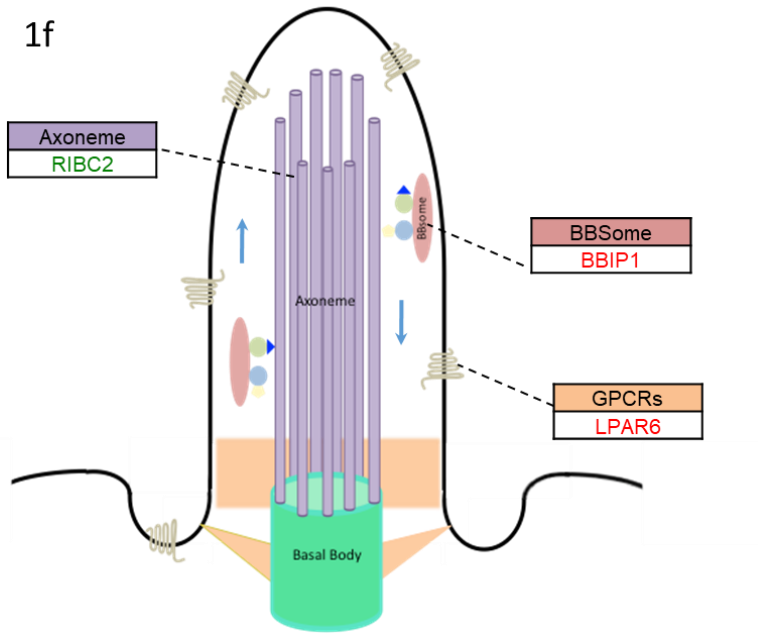

Supplement: NIHMS1669618-supplement-mmc1.pdf [file NIHMS1669618-supplement-mmc1.pdf]
