# Supplementary material
Source: PubMed Central journal article supplement (PMC9121176)
Supplement: NIHMS1669618-supplement-mmc2.pdf [file NIHMS1669618-supplement-mmc2.pdf]

| Gene      | Amygdala | Caudate | Hemisp | Cortex | Cortex | mpus  | amus  | Accumb n | tia Nigra |       |
|-----------|----------|---------|--------|--------|--------|-------|-------|----------|-----------|-------|
| SNAP25    | 475.3    | 379.1   | 3166   | 685.1  | 1829   | 473.5 | 286.1 | 438.9    | 258.6     | 160.7 |
| HSPA8     | 197.4    | 257.9   | 662.8  | 510.7  | 513.4  | 202.8 | 352   | 298.6    | 218.8     | 283.1 |
| TUBA1A    | 352.1    | 336     | 562.7  | 381.9  | 429.4  | 403.4 | 655.8 | 383.4    | 329.1     | 642.6 |
| ACTG1     | 580.7    | 613.3   | 542    | 774.3  | 827    | 551.6 | 719.1 | 803.3    | 519.4     | 637.1 |
| PKD1      | 19.27    | 24.32   | 484.4  | 84.66  | 58.56  | 23.24 | 33.45 | 28.73    | 20.25     | 14.97 |
| TUBB2A    | 133.6    | 89.53   | 242.7  | 223.9  | 279.1  | 116.5 | 193.4 | 134.8    | 70.3      | 107.6 |
| DPYSL2    | 114.6    | 105.4   | 239.9  | 153.5  | 201.7  | 110.6 | 141.1 | 96.32    | 102       | 123.9 |
| VDAC3     | 65.52    | 79.79   | 233.5  | 107.5  | 168.5  | 71.94 | 116.8 | 86.34    | 62.41     | 79.12 |
| CTNNB1    | 44.93    | 48.01   | 201.3  | 56.28  | 64.18  | 46.87 | 60.77 | 50.79    | 39.99     | 45.91 |
| PPP2R1A   | 72.84    | 96.42   | 177.8  | 127.3  | 136.5  | 86.81 | 79.16 | 114      | 82.92     | 55.67 |
| PAFAH1B1  | 40.28    | 46.52   | 168.8  | 72.51  | 94.08  | 41.56 | 58.41 | 52.7     | 38.77     | 45.19 |
| ARVCF     | 12.37    | 10.15   | 165    | 17.43  | 15.92  | 18.13 | 9.703 | 11.62    | 7.791     | 7.847 |
| TUBA4A    | 44.48    | 38.59   | 132    | 132.1  | 175.9  | 41.86 | 67.03 | 44.86    | 31.55     | 34.55 |
| TUBB2B    | 179.7    | 203.2   | 122.7  | 175.4  | 168    | 111.2 | 205.4 | 248.1    | 178.1     | 229.1 |
| RAN       | 62.19    | 66.44   | 113.8  | 80.59  | 116.5  | 52.09 | 93.85 | 79.62    | 49.36     | 62.17 |
| TUBGCP6   | 15.11    | 19.26   | 109.4  | 37.57  | 27.79  | 17.27 | 20.32 | 21.37    | 15.85     | 14.1  |
| MAPRE2    | 45.67    | 50.28   | 108.9  | 57.41  | 86.36  | 45.62 | 51.34 | 53.11    | 42.38     | 49.62 |
| KIF3C     | 40       | 37.97   | 103.3  | 95.51  | 115.4  | 35.63 | 40.76 | 48.64    | 25.8      | 25.26 |
| ARRB2     | 32.96    | 20.88   | 101.9  | 49.55  | 51.97  | 40.25 | 39.13 | 24.71    | 17.23     | 29.29 |
| PARD6A    | 22.88    | 26.21   | 101.4  | 41.15  | 43.54  | 28.05 | 18.34 | 26.36    | 24.69     | 14.62 |
| TUBB3     | 45.86    | 36.73   | 101.2  | 102    | 123.1  | 45.46 | 143.8 | 45.95    | 32.36     | 61.4  |
| RAB11FIP1 | 31.48    | 33.02   | 86.42  | 60.89  | 55.53  | 33.15 | 27.59 | 34.69    | 27.84     | 23.08 |
| PRPF39    | 11.04    | 17.1    | 85.52  | 18.23  | 17.52  | 14.4  | 16.87 | 18.41    | 13.57     | 14.89 |
| ARF4      | 44.12    | 47.76   | 77.19  | 43.64  | 65.96  | 43.47 | 66.34 | 60.78    | 44.1      | 45.76 |
| CCT5      | 24.59    | 32.49   | 66.88  | 38.14  | 49.17  | 27.47 | 47.86 | 37.83    | 24.8      | 30.71 |
| IFT20     | 14.94    | 17.26   | 66.57  | 23.5   | 23.85  | 16.81 | 21.86 | 18.78    | 13.99     | 17.53 |
| ATXN10    | 34.57    | 39.14   | 66.53  | 54.47  | 66.57  | 34.47 | 45.95 | 45.14    | 31.21     | 33.33 |
| PPP1CC    | 22.37    | 26.7    | 62.14  | 24.95  | 28.74  | 22.81 | 27    | 26.41    | 23.91     | 27.34 |
| ARL3      | 27.26    | 32.69   | 57.24  | 37.93  | 43.56  | 21.46 | 29.88 | 39.77    | 26.21     | 23.49 |
| CROCC     | 6.379    | 8.511   | 57.22  | 9.663  | 9.004  | 7.255 | 10.38 | 8.101    | 6.901     | 6.506 |
| RANBP1    | 20.3     | 18.84   | 55.74  | 26.4   | 36.67  | 19.88 | 28.42 | 19.66    | 16.56     | 22.96 |
| PCM1      | 16.2     | 20.46   | 49.32  | 20.55  | 20.92  | 16.9  | 19.34 | 22.39    | 17.08     | 17.77 |
| RAB11A    | 28.33    | 30.47   | 47.53  | 28.1   | 50.53  | 26.83 | 40.5  | 34.58    | 23.89     | 29.88 |
| GLG1      | 19.77    | 27.44   | 46.8   | 30.2   | 31.5   | 20.79 | 30.18 | 28.74    | 23.38     | 23.57 |
| RAB3IP    | 8.025    | 5.521   | 46.18  | 5.036  | 6.362  | 7.501 | 6.895 | 5.443    | 5.757     | 7.922 |
| TUBGCP2   | 13.1     | 16.56   | 45.42  | 26.63  | 23.87  | 13.78 | 16.98 | 18.53    | 14.23     | 13.6  |
| AHI1      | 5.561    | 6.461   | 45.35  | 12.64  | 13.75  | 6.225 | 17.45 | 7.13     | 5.447     | 6.802 |
| TULP3     | 9.101    | 10.16   | 45.33  | 9.814  | 8.519  | 7.915 | 8.035 | 8.686    | 8.033     | 7.215 |
| BBS2      | 38.49    | 56.78   | 45.25  | 50.85  | 47.27  | 33.74 | 35.37 | 51.13    | 43.82     | 34.42 |
| ODF2      | 5.764    | 7.46    | 43.89  | 11.19  | 10.02  | 7.074 | 10.26 | 6.949    | 6.192     | 6.979 |
| KIF3A     | 12.52    | 12.94   | 43.14  | 19.08  | 35.26  | 14.52 | 22.73 | 15.36    | 9.461     | 14.74 |
| KIF3B     | 22.91    | 25.09   | 41.61  | 36.39  | 39.53  | 22.55 | 23.45 | 28.57    | 20.69     | 19.91 |
| BBS1      | 15.31    | 20.59   | 41.19  | 27.14  | 26.7   | 12.13 | 18.06 | 23.9     | 14.55     | 10.93 |
| DPY30     | 28.16    | 25.63   | 40.43  | 28.54  | 40.45  | 26.9  | 43.53 | 28.11    | 21.98     | 33.88 |
| IFT46     | 12.88    | 16.96   | 39.65  | 19.53  | 21.52  | 13.1  | 19.66 | 18.8     | 11.88     | 11.19 |
| TRAPPC3   | 14.18    | 17.7    | 37.72  | 21.17  | 24.1   | 14.51 | 20.38 | 18.83    | 14.01     | 16.82 |
| GSK3B     | 9.276    | 11.27   | 35.75  | 14.93  | 23.81  | 9.942 | 15.05 | 11.93    | 8.686     | 9.609 |
| PTCH1     | 3.34     | 3.721   | 35.15  | 4.518  | 4.027  | 2.436 | 4.627 | 5.654    | 2.571     | 3.546 |

|           |       |       |       |       |       |       |       |       |       |        |
|-----------|-------|-------|-------|-------|-------|-------|-------|-------|-------|--------|
| HTT       | 12.77 | 12.62 | 34.65 | 25.31 | 23.91 | 13.06 | 9.957 | 13.23 | 10.58 | 7.963  |
| CBY1      | 19.52 | 22.59 | 31.76 | 20.06 | 21.43 | 19.54 | 24.78 | 23.01 | 19.09 | 21.91  |
| CEP164    | 6.157 | 8.034 | 31.5  | 8.739 | 7.938 | 6.389 | 8.879 | 8.736 | 6.625 | 7.139  |
| PDZD7     | 2.733 | 8.196 | 31.19 | 10.08 | 10.26 | 3.563 | 5.413 | 7.839 | 6.123 | 4.987  |
| GPR175 (T | 8.444 | 10.04 | 31.04 | 13.28 | 11.88 | 8.858 | 12.62 | 10.45 | 9.017 | 9.48   |
| CP110     | 15.84 | 14.29 | 30.84 | 11.19 | 14.33 | 18.44 | 17.02 | 11.41 | 16.24 | 20.32  |
| PKD2      | 7.565 | 10.25 | 30.75 | 10.75 | 10.55 | 8.731 | 8.412 | 8.834 | 8.471 | 9.068  |
| OCRL      | 10.91 | 13.04 | 30.7  | 18.97 | 23.74 | 13.48 | 24.08 | 16.14 | 9.306 | 13.2   |
| FUZ       | 15.16 | 18.87 | 29.91 | 21.16 | 20.22 | 15.08 | 15.09 | 18.5  | 16.27 | 16.54  |
| VHL       | 9.074 | 8.615 | 29.8  | 9.462 | 12.71 | 8.639 | 11.13 | 10.76 | 6.381 | 7.356  |
| CDYL2     | 2.944 | 4.511 | 29.39 | 6.797 | 8.308 | 2.975 | 3.96  | 5.898 | 3.415 | 2.469  |
| WDR19     | 5.287 | 8.242 | 29.38 | 10.63 | 9.518 | 6.06  | 9.869 | 9.096 | 5.795 | 4.797  |
| CETN2     | 48.09 | 47.84 | 29.12 | 41.52 | 51.06 | 41.95 | 65.83 | 56.88 | 34.09 | 46.75  |
| IFT172    | 7.1   | 10.5  | 28.74 | 16.6  | 13.75 | 8.712 | 11.81 | 10.1  | 7.634 | 8.383  |
| TRIM32    | 2.732 | 3.486 | 28.46 | 5.455 | 7.607 | 2.992 | 4.673 | 3.708 | 2.611 | 2.683  |
| FOPNL     | 14.93 | 16.96 | 28.18 | 16.47 | 21.07 | 13.9  | 18.21 | 17.8  | 13.49 | 15.67  |
| PDE6D     | 17.98 | 20.28 | 27.85 | 18.26 | 21.66 | 18.05 | 22.16 | 19.67 | 17.86 | 21.15  |
| WDR60     | 7.712 | 11.88 | 27.77 | 15.26 | 14.29 | 9.393 | 11.73 | 12.09 | 9.032 | 8.18   |
| ADCY3     | 7.498 | 16.05 | 27.71 | 17.14 | 14.11 | 7.133 | 11.03 | 16.31 | 11.07 | 8.446  |
| MKKS      | 9.381 | 11.95 | 26.91 | 16.54 | 19.81 | 9.147 | 12.14 | 12.68 | 9.479 | 9.313  |
| GPR83     | 1.252 | 2.753 | 26.68 | 3.984 | 4.175 | 2.526 | 4.117 | 2.117 | 2.243 | 0.3119 |
| STK36     | 5.985 | 9.367 | 26.41 | 17.06 | 12.57 | 7.2   | 10.36 | 10.43 | 6.445 | 5.346  |
| STX3      | 3.814 | 4.407 | 26.19 | 9.225 | 9.413 | 5.209 | 5.597 | 4.304 | 3.864 | 5.396  |
| IFT122    | 7.618 | 13.64 | 25.86 | 17.29 | 16.01 | 7.425 | 10.36 | 17.19 | 9.951 | 6.095  |
| IFT140    | 5.367 | 7.729 | 24.91 | 10.84 | 9.728 | 5.741 | 10.21 | 8.495 | 5.349 | 4.771  |
| C21orf2   | 17.84 | 19.52 | 23.94 | 25.51 | 25.34 | 19.01 | 20.41 | 23.46 | 16.07 | 16.92  |
| TUBGCP4   | 3.586 | 6.478 | 23.76 | 7.568 | 8.039 | 3.379 | 4.484 | 5.615 | 4.74  | 3.508  |
| INPP5E    | 6.508 | 6.131 | 23.53 | 14.14 | 11.78 | 6.529 | 9.596 | 7.225 | 5.263 | 5.943  |
| JADE1     | 3.768 | 5.297 | 23.15 | 6.113 | 7.213 | 3.163 | 5.969 | 5.647 | 4.292 | 4.197  |
| IQCB1     | 7.112 | 7.821 | 22.93 | 10.68 | 12.71 | 7.389 | 9.896 | 9.122 | 6.378 | 8.541  |
| BBS7      | 4.608 | 6.12  | 21.09 | 10.28 | 13.49 | 5.705 | 8.723 | 5.857 | 4.562 | 5.181  |
| CENPJ     | 1.93  | 2.576 | 20.92 | 4.3   | 3.892 | 2.071 | 2.797 | 3.189 | 2.455 | 2.798  |
| AZI1      | 5.306 | 5.584 | 20.64 | 6.713 | 5.978 | 5.285 | 6.252 | 5.51  | 4.972 | 4.731  |
| CCDC28B   | 5.595 | 5.552 | 20.63 | 6.354 | 6.883 | 5.169 | 5.258 | 5.989 | 4.73  | 4.662  |
| IFT80     | 11.41 | 11.77 | 20.41 | 14.97 | 16.3  | 15.47 | 13.4  | 11.56 | 10.46 | 14.26  |
| TTLL3     | 12.11 | 15.16 | 20.29 | 17.25 | 13.3  | 12.36 | 16    | 16.38 | 11.43 | 11.91  |
| OFD1      | 8.007 | 9.909 | 19.88 | 8.734 | 8.051 | 8.084 | 10.41 | 10.09 | 8.478 | 10     |
| GAS8      | 5.586 | 7.427 | 19.24 | 12.66 | 11.92 | 6.001 | 8.707 | 8.54  | 5.549 | 6.956  |
| TMEM237   | 6.086 | 6.79  | 18.91 | 8.547 | 10.39 | 5.273 | 8.877 | 7.155 | 4.732 | 6.13   |
| MAL       | 92.6  | 82.95 | 18.88 | 56.93 | 56.67 | 113.8 | 57.47 | 65.87 | 110.2 | 111.1  |
| TOPORS    | 5.047 | 6.732 | 18.87 | 6.456 | 7.135 | 5.295 | 6.679 | 7.17  | 5.44  | 5.567  |
| IFT52     | 9.098 | 9.914 | 18.52 | 9.918 | 10.91 | 8.985 | 12.25 | 11.13 | 8.617 | 9.019  |
| TRAPPC9   | 7.02  | 8.835 | 18.06 | 15.9  | 14    | 6.927 | 9.165 | 9.721 | 7.603 | 8.176  |
| TNPO1     | 7.018 | 8.079 | 18.01 | 7.19  | 8.955 | 8.002 | 10.13 | 7.676 | 6.731 | 8.813  |
| TMEM216   | 8.189 | 9.768 | 17.95 | 9.133 | 8.777 | 6.881 | 9.343 | 10.57 | 7.89  | 7.079  |
| DYNLT1    | 11.97 | 11.77 | 17.61 | 9.877 | 10.15 | 11.38 | 15.47 | 12.19 | 10.02 | 14.3   |
| TTBK2     | 4.534 | 5.181 | 17.27 | 8.183 | 11.83 | 5.048 | 8.134 | 5.024 | 4.121 | 6.218  |
| BBS5      | 11.06 | 11.12 | 17.22 | 13.63 | 14.75 | 11.92 | 13.46 | 13.44 | 8.796 | 9.463  |
| TCTN3     | 8.7   | 13.32 | 17.01 | 13.22 | 12.5  | 8.318 | 11.82 | 13.27 | 10.61 | 9.355  |

|          |        |        |       |       |        |        |       |        |        |        |
|----------|--------|--------|-------|-------|--------|--------|-------|--------|--------|--------|
| BBS10    | 5.654  | 7.08   | 16.73 | 6.238 | 8.921  | 6.09   | 6.529 | 7.47   | 5.647  | 5.591  |
| NIN      | 5.489  | 7.565  | 16.5  | 7.016 | 7.046  | 4.986  | 4.125 | 6.177  | 5.718  | 3.748  |
| RAB8A    | 5.772  | 6.933  | 16.5  | 7.009 | 7.764  | 5.983  | 7.38  | 6.44   | 5.678  | 7.193  |
| IFT27    | 14.02  | 16.55  | 16.2  | 14.06 | 16.17  | 13.01  | 17.2  | 17.57  | 14.37  | 13.74  |
| TTC21B   | 2.813  | 4.252  | 16.06 | 5.572 | 5.38   | 3.492  | 4.387 | 4.467  | 3.401  | 3.5    |
| NEK4     | 7.258  | 9.056  | 15.81 | 8.258 | 10.02  | 6.1    | 9.046 | 9.292  | 5.945  | 7.312  |
| CLUAP1   | 5.378  | 7.602  | 14.5  | 7.315 | 8.243  | 4.977  | 6.835 | 8.609  | 5.691  | 5.383  |
| BBIP1    | 4.803  | 6.008  | 14.19 | 5.856 | 6.256  | 5.214  | 6.349 | 5.891  | 4.822  | 6.276  |
| SYNE2    | 1.394  | 1.953  | 14.01 | 2.213 | 1.818  | 1.533  | 1.966 | 1.73   | 1.604  | 1.915  |
| CEP104   | 6.132  | 6.893  | 13.9  | 6.607 | 7.265  | 6.829  | 7.517 | 6.658  | 6.633  | 8.896  |
| TUBGCP3  | 3.844  | 4.893  | 13.88 | 5.314 | 6.499  | 4.283  | 5.265 | 4.992  | 4.093  | 4.774  |
| IFT43    | 9.087  | 11.89  | 13.46 | 9.704 | 10.18  | 8.213  | 10.54 | 12.14  | 9.783  | 7.932  |
| NGFR     | 1.257  | 1.235  | 13.06 | 1.195 | 1.023  | 2.297  | 3.338 | 0.9633 | 1.838  | 5.229  |
| NEK1     | 5.613  | 6.878  | 13    | 6.874 | 6.917  | 4.866  | 6.828 | 7.558  | 4.978  | 6.227  |
| STK38L   | 5.534  | 6.687  | 12.97 | 7.737 | 9.134  | 5.294  | 7.002 | 6.427  | 5.235  | 6.414  |
| TCTN2    | 3.183  | 7.404  | 12.85 | 6.417 | 6.384  | 3.263  | 7.441 | 8.726  | 4.274  | 3.195  |
| RAB8B    | 8.61   | 8.154  | 12.83 | 7.175 | 10.7   | 9.932  | 11.21 | 9.458  | 6.07   | 10.36  |
| TBC1D30  | 1.7    | 3.162  | 12.52 | 4.448 | 6.154  | 2.196  | 2.704 | 3.476  | 2.363  | 1.52   |
| BBS4     | 7.829  | 8.303  | 12.49 | 14.12 | 10.99  | 7.46   | 11.29 | 9.329  | 7.09   | 8.99   |
| TRAF3IP1 | 7.343  | 8.294  | 12.46 | 9.081 | 11.34  | 8.035  | 11.18 | 8.758  | 6.87   | 9.408  |
| HEATR2   | 4.386  | 5.632  | 12.23 | 6.218 | 5.316  | 4.13   | 5.321 | 5.893  | 4.237  | 4.255  |
| NPFFR1   | 0.6932 | 0.4223 | 11.59 | 1.01  | 0.9905 | 0.7982 | 2.053 | 1.831  | 0.3527 | 0.8999 |
| MKS1     | 3.654  | 4.631  | 11.52 | 5.16  | 4.849  | 3.736  | 5.33  | 4.908  | 3.82   | 4.508  |
| TMEM138  | 3.767  | 4.643  | 11.22 | 4.799 | 4.732  | 4.032  | 5.848 | 4.458  | 3.786  | 4.94   |
| IFT81    | 3.352  | 4.345  | 11.01 | 4.228 | 4.656  | 3.476  | 5.283 | 4.649  | 2.985  | 3.276  |
| FBF1     | 5.933  | 7.322  | 10.98 | 8.374 | 7.151  | 6.309  | 6.457 | 8.245  | 6.582  | 5.688  |
| IFT57    | 8.187  | 10.08  | 10.59 | 14.79 | 19.12  | 8.203  | 12.66 | 10.48  | 7.736  | 8.718  |
| SUFU     | 4.434  | 5.638  | 10.48 | 5.844 | 4.624  | 3.613  | 3.572 | 5.888  | 4.253  | 3.658  |
| RAB23    | 3.83   | 3.409  | 10.27 | 4.02  | 5.014  | 3.132  | 5.012 | 3.283  | 2.358  | 4.067  |
| LZTFL1   | 5.619  | 6.89   | 10.26 | 10.93 | 14.91  | 4.816  | 7.468 | 7.997  | 4.301  | 4.094  |
| NPHP3    | 4.791  | 6.603  | 10.23 | 5.892 | 4.721  | 4.811  | 5.454 | 5.99   | 4.841  | 6.09   |
| DNAL1    | 6.587  | 7.153  | 10.22 | 6.851 | 9.574  | 6.767  | 7.702 | 8.3    | 5.159  | 5.639  |
| C2CD3    | 2.705  | 3.536  | 9.813 | 4.715 | 4.06   | 3.066  | 3.737 | 3.729  | 2.963  | 3.013  |
| HSPB11   | 6.676  | 6.156  | 9.617 | 6.181 | 7.623  | 5.279  | 7.042 | 6.575  | 4.897  | 5.561  |
| DNAAF2   | 3.385  | 3.675  | 9.453 | 4.168 | 5.594  | 3.411  | 4.99  | 4.325  | 2.889  | 3.607  |
| HYLS1    | 2.06   | 2.976  | 9.422 | 4.414 | 5.617  | 2.136  | 3.277 | 3.374  | 2.243  | 1.657  |
| TTC8     | 4.151  | 6.313  | 9.28  | 5.717 | 6.745  | 4.518  | 6.908 | 7.983  | 4.342  | 3.176  |
| ASAP1    | 7.624  | 8.165  | 8.99  | 13.07 | 15.22  | 7.398  | 10.05 | 9.294  | 6.258  | 9.75   |
| TRIP11   | 2.666  | 3.505  | 8.909 | 3.761 | 3.694  | 2.709  | 3.16  | 3.295  | 2.781  | 3.093  |
| ARL6     | 3.4    | 4.834  | 8.895 | 5.108 | 8.888  | 3.875  | 5.217 | 6.087  | 3.563  | 3.084  |
| IFT22    | 13.62  | 16.02  | 8.757 | 17.03 | 20.79  | 12.52  | 15.77 | 18.44  | 11.9   | 11.98  |
| CEP89    | 3.064  | 3.396  | 8.746 | 3.754 | 3.656  | 2.948  | 4.113 | 4.244  | 2.79   | 2.697  |
| CEP290   | 2.867  | 3.589  | 8.676 | 5.577 | 4.649  | 3.353  | 4.543 | 3.743  | 3.017  | 3.628  |
| NEK7     | 20.39  | 14.63  | 8.671 | 11.21 | 12.56  | 19.27  | 23.26 | 11.93  | 16.12  | 26.5   |
| TUBGCP5  | 3.001  | 4.113  | 8.605 | 6.479 | 7.597  | 3.662  | 5.957 | 4.673  | 3.437  | 4.167  |
| NME5     | 11.55  | 16.77  | 8.233 | 12.58 | 20.51  | 12.41  | 13.57 | 17.98  | 10.11  | 9.117  |
| NME7     | 5.062  | 6.729  | 8.221 | 8.617 | 9.297  | 4.952  | 7.252 | 7.685  | 4.504  | 5.302  |
| RFX3     | 3.099  | 3.298  | 8.211 | 3.993 | 4.346  | 3.359  | 3.077 | 4.704  | 2.119  | 2.117  |
| NPHP4    | 3.458  | 5.41   | 8.062 | 8.185 | 6.153  | 4.447  | 4.423 | 6.84   | 4.173  | 3.099  |

|          |        |        |       |       |       |        |        |        |        |        |
|----------|--------|--------|-------|-------|-------|--------|--------|--------|--------|--------|
| TMEM231  | 5.219  | 7.524  | 7.976 | 6.887 | 6.399 | 5.269  | 7.691  | 8.376  | 5.01   | 5.33   |
| SDCCAG8  | 6.009  | 6.435  | 7.964 | 5.816 | 6.748 | 5.878  | 6.258  | 6.043  | 5.204  | 6.451  |
| CEP19    | 4.62   | 6.37   | 7.874 | 7.879 | 10.01 | 4.615  | 6.553  | 7.652  | 4.036  | 4.017  |
| TRAPPC10 | 2.485  | 2.989  | 7.676 | 3.724 | 4.154 | 3.098  | 3.116  | 3.149  | 2.628  | 3.297  |
| DNAH1    | 2.726  | 3.753  | 7.65  | 7.596 | 4.621 | 3.604  | 4.005  | 3.826  | 2.768  | 2.842  |
| SASS6    | 0.9701 | 1.109  | 7.095 | 1.139 | 1.264 | 1.075  | 1.252  | 0.9494 | 0.9495 | 1.27   |
| SMO      | 5.043  | 6.162  | 6.963 | 6.096 | 4.894 | 4.143  | 5.522  | 6.335  | 4.736  | 5.384  |
| DYNC2LI1 | 6.245  | 9.507  | 6.733 | 9.416 | 11.16 | 6.67   | 8.877  | 11.14  | 6.952  | 5.599  |
| ZNF423   | 4.206  | 4.174  | 6.529 | 5.59  | 4.542 | 2.933  | 4.64   | 4.226  | 3.26   | 4.069  |
| IFT74    | 4.223  | 4.344  | 6.493 | 3.766 | 4.016 | 3.916  | 5.938  | 4.422  | 3.296  | 3.808  |
| ALMS1    | 1.605  | 2.002  | 6.346 | 2.07  | 1.678 | 1.824  | 1.854  | 1.927  | 1.559  | 1.786  |
| PIBF1    | 2.548  | 3.389  | 6.327 | 3.232 | 3.79  | 2.813  | 3.758  | 3.492  | 2.657  | 2.853  |
| CEP72    | 1.635  | 2.283  | 6.322 | 3.362 | 3.194 | 1.792  | 1.433  | 2.974  | 1.807  | 1.119  |
| DPCD     | 19.63  | 20.19  | 6.307 | 22.38 | 26    | 17.06  | 24.12  | 26.13  | 15.43  | 16.77  |
| DNALI1   | 7.167  | 7.249  | 6.29  | 7.583 | 7.043 | 6.114  | 12.82  | 6.169  | 4.692  | 7.931  |
| RSPH1    | 17.49  | 31.13  | 6.231 | 14.51 | 15.75 | 15.03  | 27.17  | 34.42  | 19.28  | 11.39  |
| RTTN     | 1.052  | 2.181  | 6.175 | 1.562 | 1.277 | 1.21   | 1.492  | 2.197  | 1.966  | 1.823  |
| RILPL1   | 7.713  | 8.269  | 6.127 | 9.789 | 10.09 | 7.887  | 7.392  | 7.833  | 8.258  | 10.04  |
| RPGR     | 2.136  | 2.981  | 6.071 | 2.561 | 2.851 | 2.504  | 3.953  | 2.679  | 2.222  | 3.075  |
| B9D1     | 6.183  | 13.46  | 5.753 | 9.967 | 11.1  | 6.998  | 8.441  | 15.36  | 8.899  | 4.55   |
| SCLT1    | 1.76   | 2.519  | 5.659 | 2.386 | 2.641 | 2.118  | 2.445  | 2.832  | 2.107  | 1.956  |
| BBS9     | 3.116  | 4.004  | 5.612 | 3.834 | 3.957 | 3.396  | 4.555  | 3.988  | 3.277  | 3.956  |
| GPAM     | 8.221  | 10.66  | 5.55  | 7.122 | 6.176 | 3.94   | 3.861  | 10.66  | 8.156  | 5.055  |
| IFT88    | 3.574  | 4.944  | 5.278 | 3.304 | 3.494 | 3.878  | 5.53   | 5.079  | 4.147  | 4.544  |
| PTPDC1   | 3.577  | 8.008  | 5.221 | 4.223 | 3.98  | 5.98   | 4.284  | 9.718  | 6.771  | 5.337  |
| TCTN1    | 5.904  | 8.921  | 5.215 | 6.561 | 6.699 | 5.851  | 8.404  | 9.603  | 6.362  | 6.478  |
| CRB1     | 2.085  | 2.42   | 4.538 | 2.545 | 2.456 | 1.61   | 1.25   | 2.056  | 1.604  | 0.8755 |
| hap1     | 7.972  | 6.826  | 4.49  | 7.303 | 6.981 | 5.937  | 27.87  | 8.665  | 5.532  | 5.055  |
| TUBA1C   | 2.179  | 1.651  | 4.346 | 2.472 | 2.43  | 2.051  | 2.808  | 1.607  | 1.489  | 3.49   |
| TMEM67   | 1.673  | 3.477  | 4.3   | 2.751 | 2.899 | 2.038  | 3.381  | 3.488  | 1.946  | 1.227  |
| WDR35    | 3.149  | 4.35   | 4.195 | 3.982 | 4.055 | 3.226  | 5.071  | 4.774  | 3.059  | 3.51   |
| EFHC1    | 1.565  | 2.661  | 4.069 | 2.291 | 2.171 | 1.849  | 2.618  | 2.79   | 1.87   | 1.709  |
| STAT6    | 8.968  | 15.81  | 4.017 | 24.27 | 20.54 | 8.593  | 7.845  | 15.77  | 11.59  | 9.511  |
| ARL13B   | 2.378  | 3.607  | 4.001 | 2.347 | 2.66  | 2.759  | 3.037  | 3.29   | 2.709  | 2.678  |
| DYNC2H1  | 1.603  | 2.397  | 3.855 | 2.893 | 2.485 | 1.66   | 2.696  | 2.542  | 1.536  | 1.639  |
| INVS     | 1.657  | 2.138  | 3.684 | 2.907 | 2.408 | 2.049  | 2.155  | 2.008  | 1.707  | 2.27   |
| XPNPEP3  | 2.428  | 2.869  | 3.684 | 2.533 | 2.744 | 2.446  | 2.892  | 3.083  | 2.307  | 2.677  |
| PDGFRA   | 16.77  | 8.95   | 3.508 | 7.553 | 9.638 | 12.16  | 12.57  | 8.649  | 6.127  | 11.46  |
| TBC1D7   | 1.811  | 1.901  | 3.488 | 3.224 | 3.971 | 1.999  | 2.369  | 1.974  | 1.715  | 1.768  |
| CC2D2A   | 3.147  | 3.474  | 3.483 | 3.515 | 3.433 | 2.904  | 3.639  | 3.496  | 2.741  | 3.32   |
| TTC12    | 1.752  | 3.253  | 3.466 | 2.149 | 2.012 | 1.698  | 2.799  | 3.777  | 2.972  | 2.276  |
| TTC26    | 0.9154 | 1.592  | 3.373 | 1.559 | 1.669 | 1.162  | 1.876  | 1.744  | 1      | 0.9622 |
| RSPH3    | 1.934  | 2.878  | 3.305 | 2.979 | 4.271 | 2.074  | 2.946  | 2.877  | 1.93   | 1.898  |
| CCDC40   | 1.239  | 2.764  | 3.299 | 2.336 | 1.854 | 1.58   | 3.394  | 2.623  | 1.695  | 1.553  |
| INTU     | 2.663  | 4.038  | 3.241 | 3.572 | 3.167 | 3.023  | 3.651  | 5.387  | 2.457  | 3.208  |
| CCDC41   | 2.824  | 2.268  | 3.161 | 2.731 | 3.109 | 2.321  | 2.463  | 2.33   | 1.604  | 1.757  |
| CEP41    | 1.94   | 2.846  | 3.138 | 2.889 | 3.977 | 2.296  | 3.579  | 3.375  | 2.101  | 2.475  |
| RP2      | 2.021  | 2.083  | 3.072 | 1.295 | 1.664 | 2.061  | 2.476  | 2.013  | 1.621  | 2.808  |
| POMK     | 0.6029 | 0.8255 | 2.964 | 1.001 | 1.251 | 0.6754 | 0.9012 | 1.033  | 0.5634 | 0.5201 |

|                |         |         |        |        |         |         |         |        |        |        |
|----------------|---------|---------|--------|--------|---------|---------|---------|--------|--------|--------|
| RILPL2         | 3.508   | 3.29    | 2.889  | 4.307  | 4.496   | 2.928   | 3.72    | 3.368  | 2.643  | 3.015  |
| TIE1           | 3.444   | 5.149   | 2.853  | 7.712  | 5.383   | 4.66    | 4.684   | 3.554  | 5.051  | 5.9    |
| AK5            | 39.74   | 23.73   | 2.837  | 53.88  | 110.8   | 44.23   | 20.8    | 58.58  | 18.32  | 17.4   |
| RPGRIP1L       | 1.231   | 2.01    | 2.704  | 2.399  | 2.72    | 1.424   | 2.226   | 2.362  | 1.273  | 1.022  |
| CEP135         | 0.6786  | 0.8889  | 2.641  | 0.8761 | 0.9246  | 0.8245  | 1.229   | 0.8466 | 0.6989 | 1.095  |
| EGFR           | 4.947   | 7.925   | 2.396  | 6.254  | 5.611   | 2.983   | 3.287   | 6.952  | 5.39   | 4.058  |
| GPR98          | 6.684   | 12.21   | 2.394  | 8.601  | 5.662   | 2.805   | 0.8124  | 10.84  | 6.116  | 0.2735 |
| RSPH4A         | 0.6805  | 1.224   | 2.222  | 0.6417 | 0.6465  | 1.092   | 1.897   | 1.397  | 0.6137 | 0.649  |
| P2RY12         | 8.713   | 7.585   | 2.148  | 2.448  | 6.828   | 6.966   | 8.056   | 7.393  | 5.052  | 12.82  |
| LPAR6          | 4.748   | 4.441   | 2.099  | 3.472  | 3.125   | 5.58    | 6.719   | 3.655  | 3.666  | 8.292  |
| RSPH9          | 1.914   | 0.7142  | 1.961  | 1.443  | 1.526   | 1.306   | 2.653   | 0.7981 | 0.438  | 0.4271 |
| SSTR3          | 1.041   | 0.2275  | 1.959  | 7.56   | 7.923   | 1.166   | 3.712   | 0.2299 | 0.2181 | 0.6099 |
| B9D2           | 2.9997  | 4.557   | 1.958  | 4.983  | 5.267   | 3.108   | 4.808   | 5.6    | 3.264  | 2.616  |
| FBLN2          | 3.936   | 4.476   | 1.88   | 3.527  | 3.489   | 3.783   | 5.214   | 3.751  | 4.949  | 4.054  |
| PARD3          | 6.821   | 8.168   | 1.776  | 5.026  | 4.526   | 4.505   | 7.13    | 8.691  | 6.028  | 6.047  |
| DNAAF1         | 1.978   | 2.33    | 1.718  | 3.157  | 2.926   | 3.476   | 6.379   | 3.349  | 1.113  | 0.7788 |
| LRRC6          | 3.18    | 5.114   | 1.718  | 6.065  | 6.161   | 2.996   | 3.953   | 5.672  | 3.065  | 2.136  |
| GPR161         | 1.998   | 1.499   | 1.552  | 3.084  | 3.402   | 1.84    | 1.665   | 1.531  | 1.33   | 2.428  |
| WDPCP          | 0.6233  | 0.9971  | 1.525  | 1.01   | 1.101   | 0.8277  | 0.9077  | 1.196  | 0.7804 | 0.7002 |
| TTLL9          | 1.376   | 2.107   | 1.436  | 1.267  | 1.007   | 1.682   | 2.006   | 2.328  | 1.398  | 1.774  |
| TTC30A         | 1.4     | 2.014   | 1.405  | 1.798  | 2.003   | 1.357   | 1.827   | 2.018  | 1.527  | 1.432  |
| BBS12          | 1.611   | 2.976   | 1.321  | 3.547  | 3.583   | 1.646   | 2.513   | 3.328  | 1.87   | 1.26   |
| DNAH10         | 0.2213  | 0.3548  | 1.271  | 0.3198 | 0.2647  | 0.336   | 0.4511  | 0.4819 | 0.1724 | 0.2498 |
| DNAH2          | 0.4879  | 1.517   | 1.247  | 0.7876 | 0.5901  | 0.5822  | 0.3708  | 1.785  | 0.816  | 0.1019 |
| DACH1          | 0.8593  | 9.525   | 1.156  | 1.356  | 2.368   | 0.6252  | 2.629   | 5.434  | 6.908  | 0.8576 |
| KIF7           | 2.563   | 2.9     | 1.153  | 3.129  | 2.725   | 1.959   | 2.853   | 2.889  | 2.223  | 1.883  |
| KIF19          | 5.313   | 7.087   | 1.143  | 3.337  | 3.009   | 9.027   | 6.624   | 3.831  | 5.796  | 6.9    |
| AK8            | 1.446   | 1.676   | 1.105  | 1.613  | 1.485   | 1.188   | 2.349   | 2.547  | 1.155  | 1.29   |
| MCHR1          | 1.848   | 0.3961  | 1.105  | 7.809  | 9.57    | 1.731   | 4.082   | 0.5791 | 0.3575 | 1.298  |
| STIL           | 0.4538  | 0.615   | 1.105  | 0.8998 | 0.8482  | 0.532   | 0.5125  | 0.6793 | 0.5045 | 0.4496 |
| NMUR1          | 0.13    | 0.1569  | 1.075  | 0.2185 | 0.1933  | 0.1291  | 0.1318  | 0.1297 | 0.1466 | 0.1267 |
| POC1A          | 0.957   | 1.082   | 0.9987 | 2.007  | 1.937   | 1.008   | 1.314   | 1.216  | 0.9851 | 1.115  |
| NEK8           | 1.051   | 1.079   | 0.9521 | 1.35   | 1.106   | 0.9675  | 1.4222  | 1.102  | 0.9631 | 1.21   |
| GALR3          | 0.1639  | 0.2328  | 0.9478 | 0.2178 | 0.2275  | 0.1574  | 0.3065  | 0.3388 | 0.1572 | 0.1075 |
| DRD2           | 1.571   | 40.7    | 0.9254 | 1.235  | 1.041   | 0.913   | 6.495   | 51.91  | 45.74  | 8.659  |
| TTC30B         | 1.222   | 1.766   | 0.909  | 1.283  | 1.419   | 1.177   | 1.494   | 1.711  | 1.274  | 1.145  |
| PACRG          | 3.614   | 6.213   | 0.9073 | 3.779  | 4.687   | 3.327   | 6.835   | 7.232  | 3.756  | 2.32   |
| KIF27          | 0.5898  | 0.8019  | 0.8936 | 0.8677 | 0.7339  | 0.6166  | 0.8986  | 0.8361 | 0.5304 | 0.6104 |
| NPHP1          | 1.784   | 3.014   | 0.8058 | 2.412  | 2.397   | 2       | 3.871   | 3.292  | 2.193  | 1.716  |
| DISC1          | 2.043   | 1.465   | 0.6927 | 1.227  | 1.281   | 1.911   | 1.692   | 1.157  | 1.502  | 1.728  |
| DYX1C1         | 1.429   | 1.789   | 0.586  | 1.215  | 1.47    | 1.37    | 2.572   | 2.118  | 1.063  | 1.156  |
| ULK4           | 0.6074  | 0.5974  | 0.5678 | 0.7699 | 0.7128  | 0.5724  | 0.8491  | 0.6443 | 0.4067 | 0.5302 |
| USH1C          | 1.237   | 5.47    | 0.5365 | 1.737  | 0.9308  | 5.817   | 3.269   | 0.9414 | 5.794  | 8.407  |
| MUC5B          | 0.01738 | 0.02257 | 0.5154 | 0.0627 | 0.05783 | 0.02014 | 0.02318 | 0.0267 | 0.0239 | 0.0128 |
| CRB3           | 0.2175  | 0.434   | 0.4982 | 0.242  | 0.2578  | 0.2223  | 0.2624  | 0.3605 | 0.3571 | 0.2707 |
| TULP2          | 0.1721  | 0.2203  | 0.4964 | 0.5268 | 0.5683  | 0.1201  | 0.1782  | 0.2635 | 0.1397 | 0.0652 |
| <b>CCDC164</b> | 1.107   | 1.025   | 0.4871 | 1.785  | 1.687   | 1.565   | 3.485   | 1.249  | 0.3708 | 0.6494 |
| PKD1L1         | 0.1338  | 0.2397  | 0.443  | 0.2361 | 0.1922  | 0.1171  | 0.3186  | 0.3462 | 0.1541 | 0.1353 |
| DNAH5          | 0.2088  | 0.248   | 0.4083 | 0.2656 | 0.2619  | 0.2638  | 0.3874  | 0.3589 | 0.1046 | 0.2315 |

|           |         |         |        |        |         |         |         |        |        |        |
|-----------|---------|---------|--------|--------|---------|---------|---------|--------|--------|--------|
| KIF24     | 0.522   | 1.103   | 0.4083 | 1.011  | 0.7704  | 0.54    | 0.5887  | 1.406  | 0.7376 | 0.3465 |
| WDR78     | 0.6911  | 0.7936  | 0.4003 | 0.7113 | 0.7523  | 0.8413  | 1.124   | 0.8497 | 0.4963 | 0.6967 |
| RAB17     | 0.4492  | 0.3134  | 0.365  | 1.348  | 1.275   | 0.5407  | 0.6892  | 0.3597 | 0.2862 | 0.4148 |
| KIF17     | 4.092   | 5.559   | 0.3552 | 13.37  | 13.33   | 3.542   | 5.414   | 7.803  | 3.648  | 1.158  |
| FOXJ1     | 2.101   | 3.566   | 0.3495 | 1.764  | 1.664   | 3.628   | 4.336   | 2.267  | 1.018  | 3.234  |
| PRLHR     | 0.2734  | 0.5196  | 0.3168 | 0.5133 | 0.6051  | 0.1897  | 2.433   | 0.5215 | 0.3858 | 1.475  |
| SHH       | 0.5124  | 0.5832  | 0.2685 | 0.9128 | 1.119   | 0.3717  | 1.903   | 1.22   | 0.5024 | 0.8759 |
| DRD1      | 2.076   | 29.46   | 0.2427 | 4.32   | 5.733   | 1.051   | 0.7245  | 31.54  | 22.5   | 0.2197 |
| KISS1R    | 0.6684  | 0.8215  | 0.2275 | 0.6645 | 0.8759  | 0.1691  | 3.185   | 1.996  | 0.6441 | 0.3574 |
| AK7       | 0.578   | 1.358   | 0.2061 | 0.5687 | 0.7649  | 1.032   | 2.468   | 1.995  | 0.7539 | 0.5783 |
| DNAH6     | 0.4655  | 1.472   | 0.1719 | 1.209  | 0.9629  | 0.6302  | 1.01    | 1.895  | 0.7264 | 0.1827 |
| DNAH9     | 0.8265  | 1.2     | 0.1629 | 1.006  | 1.112   | 1.245   | 1.456   | 1.404  | 0.5624 | 0.6265 |
| GALR2     | 0.09807 | 0.0669  | 0.1587 | 0.1302 | 0.135   | 0.1176  | 0.6101  | 0.146  | 0.0532 | 0.1413 |
| DCDC2     | 0.4817  | 0.5683  | 0.1448 | 0.8073 | 0.9546  | 0.5299  | 0.9821  | 0.7073 | 0.2733 | 0.4117 |
| PTGER4    | 0.789   | 0.3809  | 0.1413 | 0.3058 | 0.2989  | 0.5612  | 0.9298  | 0.4643 | 0.3454 | 0.8935 |
| MC4R      | 0.6386  | 2.359   | 0.1396 | 1.078  | 1.483   | 0.2758  | 3.168   | 0.9791 | 1.821  | 0.1909 |
| PKD1L3    | 0.02307 | 0.03725 | 0.1342 | 0.0467 | 0.4337  | 0.03053 | 0.03772 | 0.0384 | 0.0266 | 0.0243 |
| TGR5 (GPI | 0.07353 | 0.08181 | 0.1264 | 0.1223 | 0.1048  | 0.08792 | 0.1035  | 0.0934 | 0.0776 | 0.0871 |
| HYDIN     | 0.1953  | 0.5135  | 0.1237 | 0.276  | 0.2176  | 0.4018  | 0.4825  | 0.6456 | 0.2343 | 0.16   |
| NPY5R     | 0.5248  | 2.054   | 0.1103 | 1.316  | 2.016   | 0.5394  | 0.9961  | 3.042  | 1.225  | 0.2525 |
| DNAAF3    | 0.167   | 0.2967  | 0.1027 | 0.1873 | 0.1349  | 0.3617  | 0.41    | 0.1878 | 0.1226 | 0.1181 |
| DNAH7     | 1.074   | 1.958   | 0.0949 | 1.974  | 1.576   | 0.8179  | 0.9747  | 1.941  | 0.9547 | 0.5004 |
| TEKT1     | 0.2437  | 0.5189  | 0.0772 | 0.427  | 0.3757  | 0.9434  | 1.276   | 0.9073 | 0.0825 | 0.354  |
| QRFR      | 0.1239  | 0.08475 | 0.0727 | 0.2058 | 0.2904  | 0.1455  | 1.317   | 0.0646 | 0.0345 | 0.1039 |
| DNAH11    | 0.07022 | 0.1297  | 0.0719 | 0.0881 | 0.06479 | 0.1302  | 0.1236  | 0.078  | 0.0672 | 0.0531 |
| RIBC2     | 0.2797  | 0.3436  | 0.0692 | 0.3731 | 0.3568  | 0.4176  | 0.8123  | 0.4224 | 0.0889 | 0.1946 |
| GPR88     | 2.204   | 81.87   | 0.0671 | 2.647  | 3.903   | 1.149   | 1.68    | 50.73  | 77.41  | 0      |
| PKD2L1    | 0.05883 | 0.1197  | 0.0423 | 2.395  | 2.851   | 0.2716  | 0.0749  | 0.1768 | 0.0945 | 0.0631 |
| TTC29     | 0.1039  | 0.1464  | 0.0264 | 0.0854 | 0.1106  | 0.2186  | 0.3476  | 0.1278 | 0.0738 | 0.1725 |
| TULP1     | 0.0681  | 0.1112  | 0.0245 | 0.0605 | 0.04307 | 0.5929  | 0.07597 | 0.0768 | 0.1695 | 0.0599 |
| DNAI2     | 0.1349  | 0.2684  | 0.0231 | 0.0655 | 0.04076 | 0.363   | 0.5976  | 0.1262 | 0.0834 | 0.1767 |
| NEK2      | 0.2646  | 0.09818 | 0.0212 | 0.5208 | 0.7745  | 0.3938  | 0.07853 | 0.1134 | 0.0437 | 0.0595 |
| HTR6      | 0.2118  | 3.111   | 0.0205 | 1.768  | 1.595   | 0.2302  | 0.4175  | 4.445  | 2.06   | 0.0834 |
| PKHD1     | 0       | 0       | 0.002  | 0.0072 | 0.00707 | 0.00134 | 0.00616 | 0      | 0      | 0      |
| DNAI1     | 0.6699  | 2.447   | 0      | 0.8179 | 0.7869  | 0.9383  | 1.369   | 2.55   | 1.418  | 0.6171 |
| DRD5      | 0.6016  | 1.144   | 0      | 1.65   | 2.252   | 0.7797  | 1.071   | 0.6641 | 1.31   | 0.1598 |
| NPY2R     | 0.7772  | 0.08253 | 0      | 0.4692 | 0.9026  | 0.5246  | 1.774   | 1.381  | 0.0418 | 0.0275 |
